# Supplementary material for: Modulation of phospho-proteins by interferon-alpha and valproic acid in acute myeloid leukemia
Source: Springer Nature journal article supplement (doi:10.1007/s00432-019-02931-1), 2019-05-20

**A**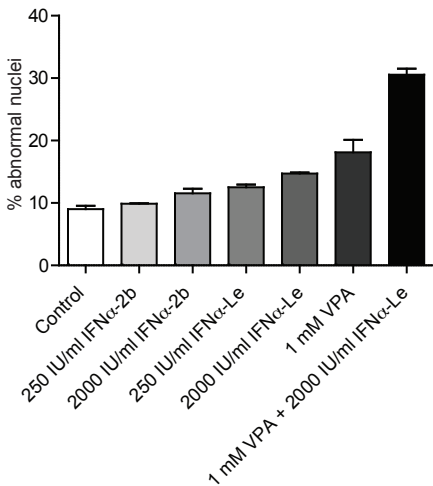**B**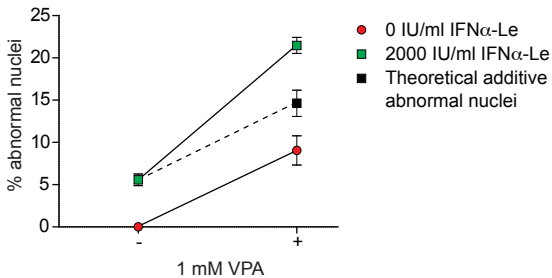

Supplement: MOESM3 [file 16736032]
