# Supplementary material for: Modulation of phospho-proteins by interferon-alpha and valproic acid in acute myeloid leukemia
Source: Springer Nature journal article supplement (doi:10.1007/s00432-019-02931-1), 2019-05-20
Supplement: MOESM5 [file 16736032]

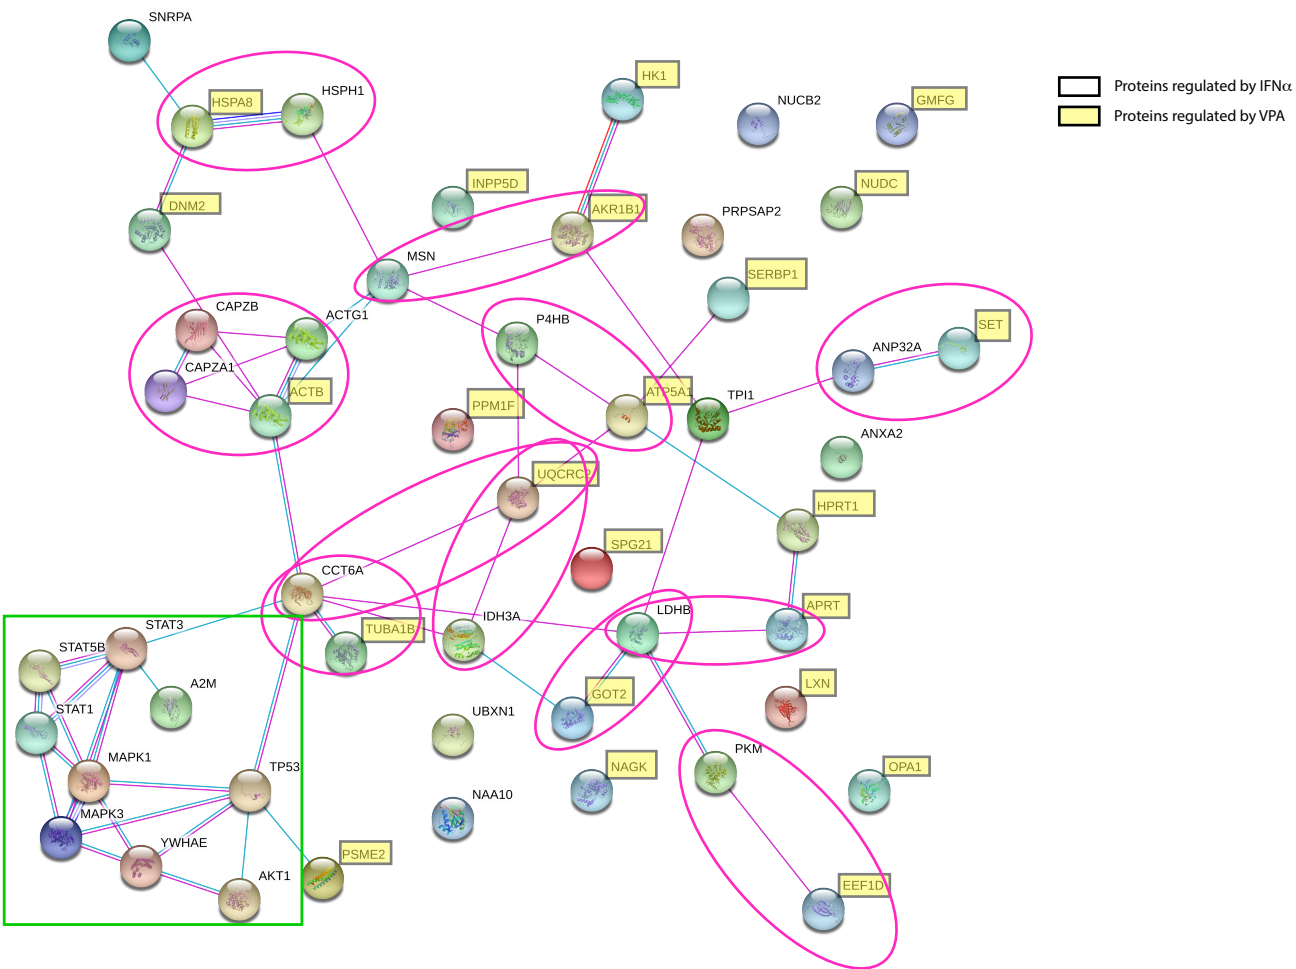

Proteins regulated by IFN $\alpha$   
 Proteins regulated by VPA

**Known Interactions**

- from curated databases
- experimentally determined

**Predicted Interactions**

- gene neighborhood
- gene fusions
- gene co-occurrence
